# Supplementary material
Source: HighWire-hosted journal article supplement (https://tobaccocontrol.bmj.com/content/27/2/170)
Supplement: inline-supplementary-material-3 [file inline-supplementary-material-3.docx]

**Table S1.b.** Levels of Flavor Compounds (Compounds 23 to 65) in Six Tobacco Products (Numbers 11 through 16) Without Explicit Flavor Names, and Three Tobacco Products (A, B, and C) With Explicit Flavor Names, All Purchased in February and March of 2015 in New York City. Products Ranked (Decreasing Order) by Totals for 93 Chemicals Determined. Values Given Are Means For Triplicate Analyses. All Values in Micrograms (μg) of Flavor Chemical per Gram of Product (µg/(g of product), Using a Maximum of Three Significant Figures. Only Values Found to be > 1.0 µg/g Are Given.

|  |  | 11 | 12 | 13 | 14 | 15 | 16 | A | B | C |
| --- | --- | --- | --- | --- | --- | --- | --- | --- | --- | --- |
|  | Compound | Camel  "Mellow”  snus  (µg/g) | Hype  “Blue Mixx”  cigarillos  (µg/g) | D’Ville  “Pink”  cigars  (µg/g) | Zig Zag  “Pink”  cigars  (µg/g) | Camel  "Robust”  snus  (µg/g) | Peach  “Sweet”  Snuff”  (µg/g) | Skoal  "Citrus"  moist snuff  (µg/g) | Black & Mild  "Cream"  "cigars"  (µg/g) | Camel Snus  "Frost"  moist snuff  (µg/g) |
|  | Total: | 1830. | 1600. | 1120. | 941. | 271. | 65.4 | 18100. | 15000. | 9300. |
| 23 | methyl cinnamate |  | 7.4 |  |  |  |  |  |  |  |
| 24 | ethyl butyrate |  |  |  |  |  |  | 40.0 |  |  |
| 25 | *p*-cymene |  |  |  |  |  |  | 295. |  | 2.6 |
| 26 | benzaldehyde |  | 12.8 |  | 4.5 | 2.0 |  | 71.1 | 4.6 | 2.0 |
| 27 | phenethyl alcohol | 5.1 | 3.2 | 1.4 | 13.1 | 78.2 | 2.1 | 9.9 | 4.4 | 7.1 |
| 28 | 2,3,5,6-tetramethylpyrazine | 194. |  |  |  |  |  |  |  |  |
| 29 | γ-terpinene |  |  |  |  |  |  | 178. |  |  |
| 30 | triacetin (common flavor carrier) |  |  |  |  |  |  |  |  |  |
| 31 | myrcene |  |  |  |  |  |  | 119. |  |  |
| 32 | decanal |  |  |  |  |  |  | 118. |  |  |
| 33 | 4-terpineol |  |  |  |  |  |  | 54.8 |  | 59.4 |
| 34 | β-damascone | 27.3 | 21.8 |  | 40.3 |  |  |  |  |  |
| 35 | ethyl cinnamate |  |  |  | 1.6 |  |  | 55.4 |  |  |
| 36 | α-pinene |  |  |  |  |  |  | 85.7 |  |  |
| 37 | furfural |  | 10.5 |  |  |  | 14.6 |  | 25.7 |  |
| 38 | *E*-2-hexen-1-ol |  |  |  |  |  |  |  |  |  |
| 39 | γ-terpineol |  |  |  |  |  |  | 46.5 |  | 14.6 |
| 40 | ethyl acetate |  |  |  |  |  |  |  |  |  |
| 41 | menthone |  |  |  |  |  |  | 16.4 |  | 56.5 |
|  |  |  |  |  |  |  |  |  |  |  |
|  | |  |  |  |  |  |  |  |  |  |
| Table S1.b (continued). | |  |  |  |  |  |  |  |  |  |
| 42 | benzyl acetate |  |  |  |  |  |  | 9.7 |  |  |
| 43 | 1,4-cineole |  |  |  |  |  |  | 55.3 |  |  |
| 44 | β-ionone |  | 3.0 | 1.0 | 4.9 |  |  |  |  |  |
| 45 | cis-linalool oxide |  |  |  |  |  |  | 42.9 |  |  |
| 46 | 1-hexanol |  |  |  |  |  |  |  |  |  |
| 47 | *Z*-3-hexenyl acetate |  |  |  |  |  |  | 18.2 |  |  |
| 48 | trans-linalool oxide |  |  |  |  |  |  | 37.8 |  |  |
| 49 | fenchyl alcohol |  |  |  |  |  |  | 35.6 |  |  |
| 50 | amyl isovalerate |  |  |  |  |  |  |  |  |  |
| 51 | 2,3-pentanedione (acetyl propionyl) |  |  |  |  |  |  |  | 17.0 |  |
| 52 | isoamyl isovalerate |  |  |  |  |  |  |  |  |  |
| 53 | citronellal |  |  |  |  |  |  | 26.2 |  |  |
| 54 | menthyl acetate |  |  |  |  |  |  | 6.0 |  | 18.3 |
| 55 | neomenthol |  |  |  |  |  |  |  |  | 22.9 |
| 56 | 1-pentanol |  | 13.8 |  |  |  |  |  |  |  |
| 57 | 6-methyl-5-hepten-2-one |  |  |  |  |  |  | 14.7 |  |  |
| 58 | isoamyl butyrate |  |  |  |  |  |  | 14.3 |  |  |
| 59 | *p*-tolualdehyde |  | 2.1 |  |  |  |  | 12.1 |  |  |
| 60 | 2-methylbutyl acetate |  |  |  |  |  |  | 5.2 |  |  |
| 61 | ethyl anthranilate |  |  | 2.4 |  |  |  |  |  |  |
| 62 | dimethyl benzyl carbinyl butyrate |  |  |  |  |  |  |  |  |  |
| 63 | hexyl hexanoate |  |  |  |  |  |  |  |  |  |
| 64 | raspberry ketone methyl ether |  | 2.3 |  |  |  |  |  |  |  |
| 65 | 2,3-butanedione (“diacetyl”) |  |  |  |  |  |  |  |  |  |
